# Supplementary figures and images for: ATR inhibition disrupts rewired homologous recombination and fork protection pathways in PARP inhibitor-resistant BRCA-deficient cancer cells
Source: PubMed Central journal article supplement — Genes Dev. 2017 Feb 1;31(3):318–32. doi: 10.1101/gad.290957.116 (PMC5358727; doi:10.1101/gad.290957.116), 2017-02-01

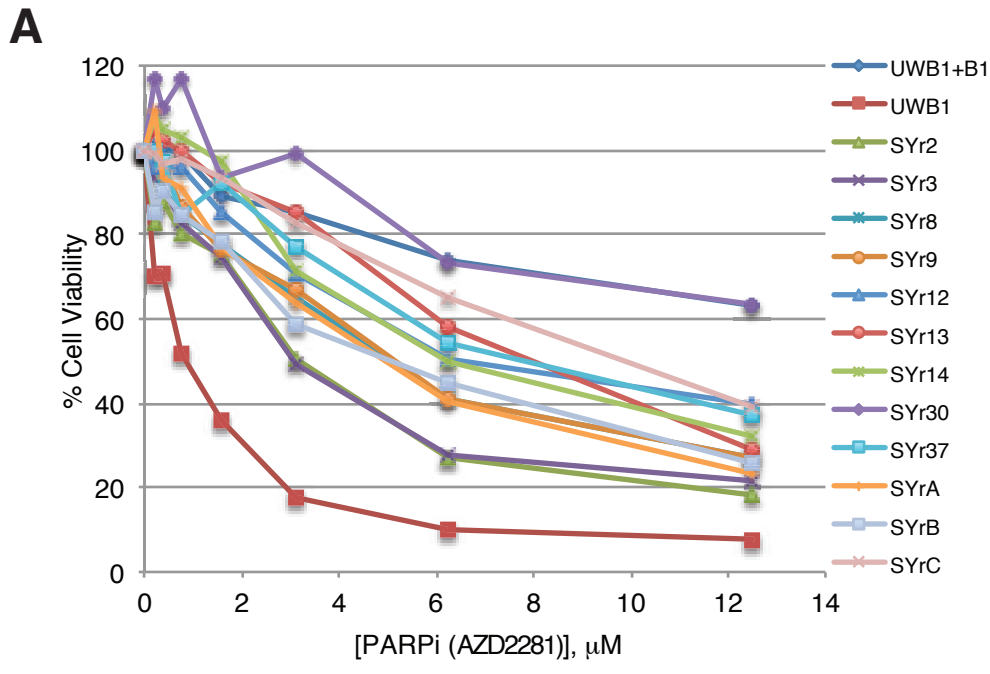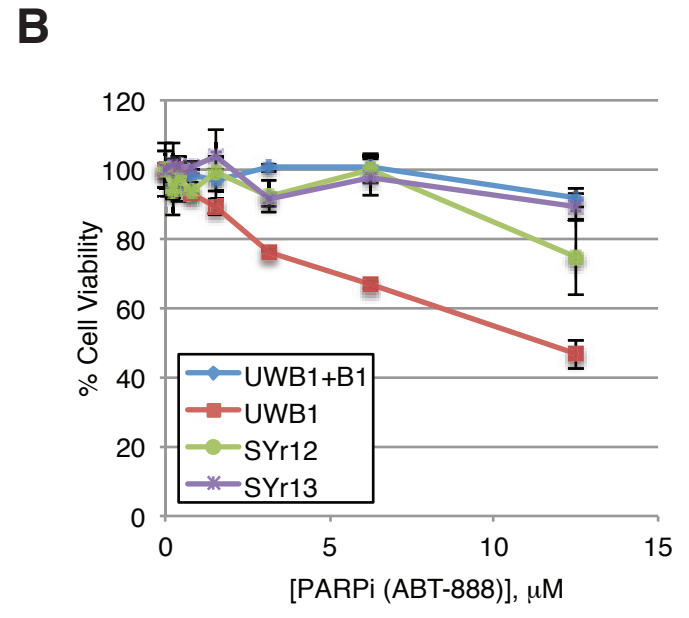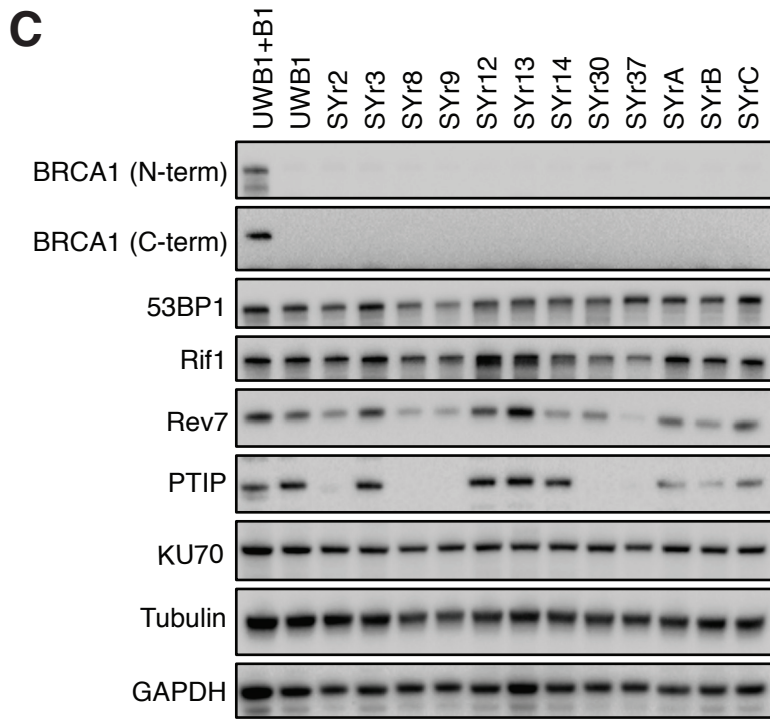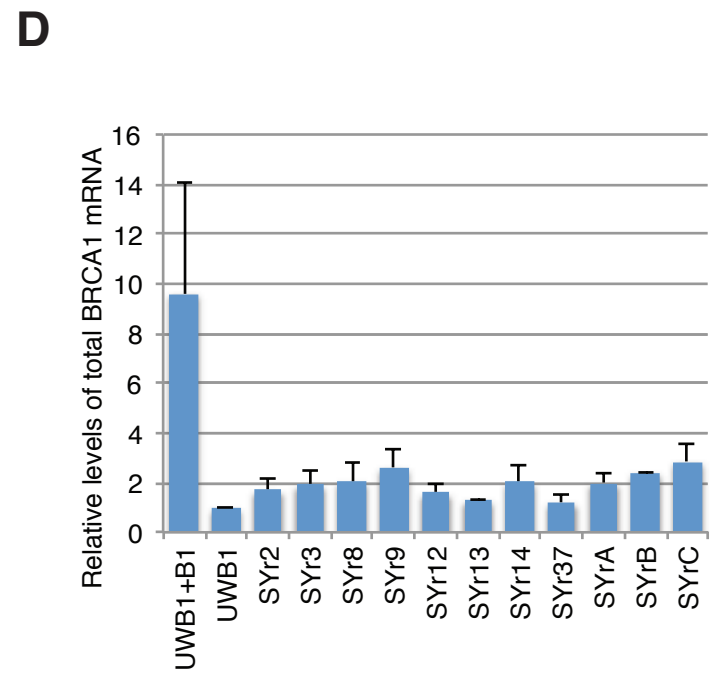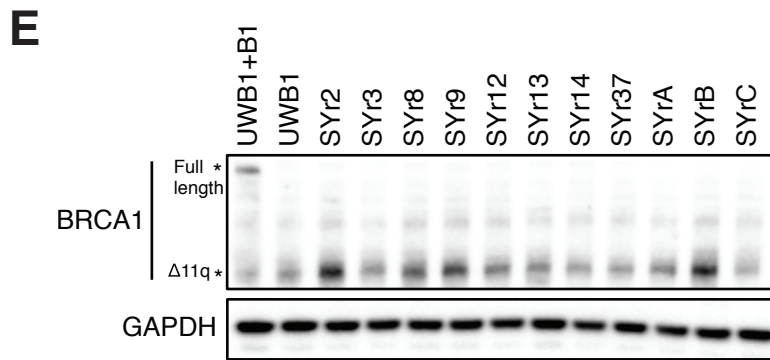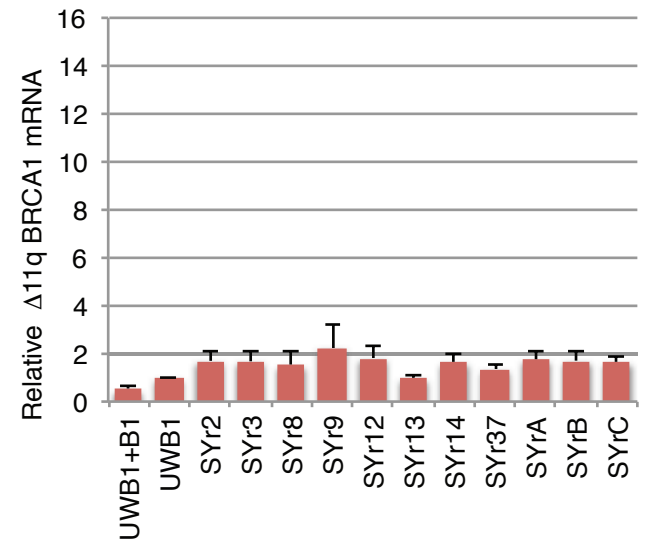

F

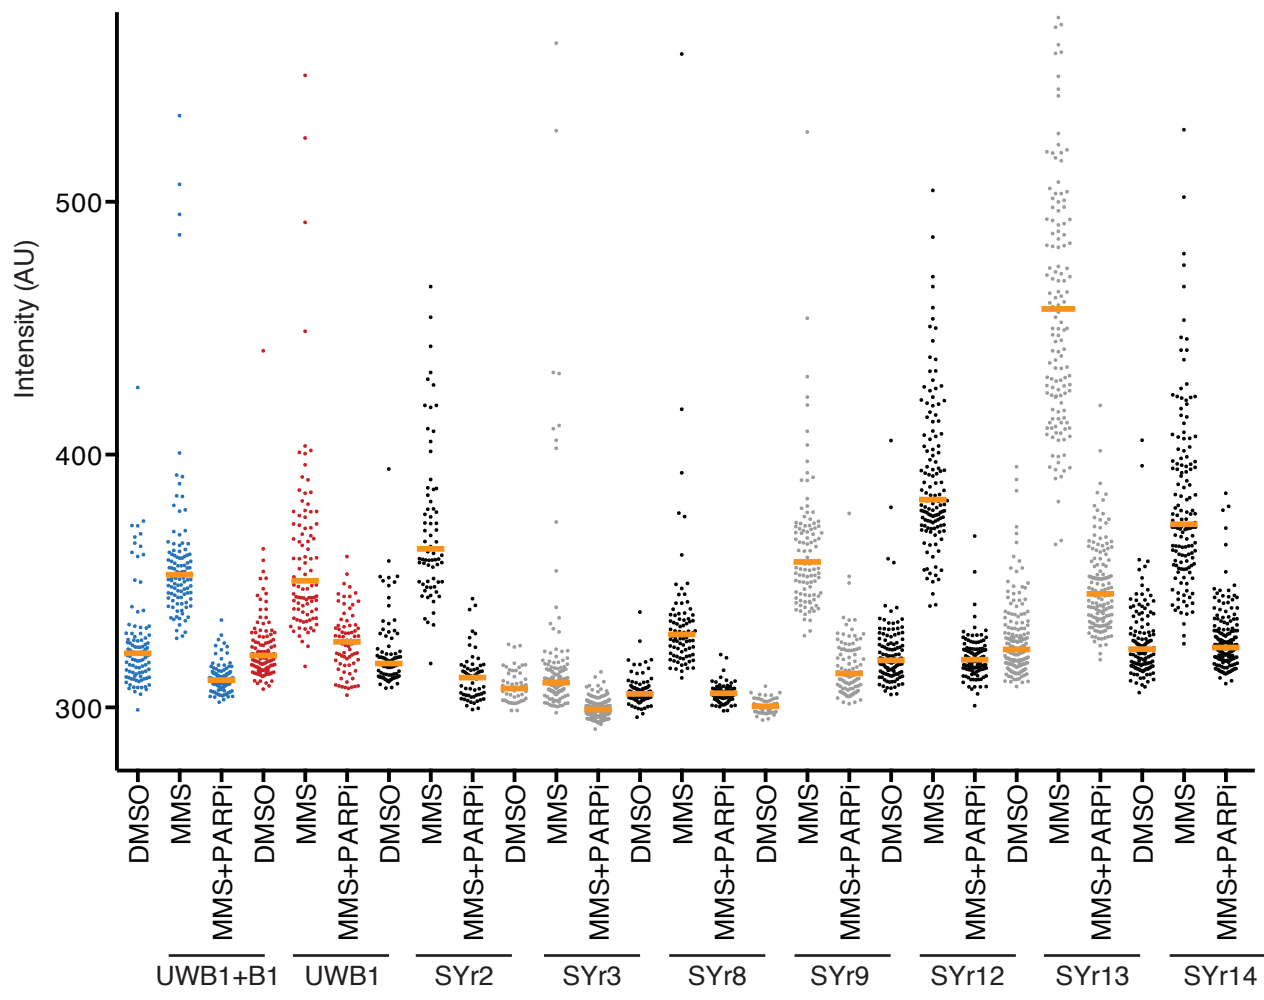

G

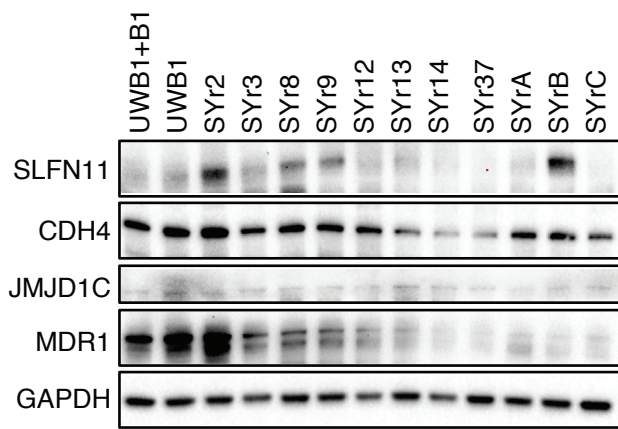

H

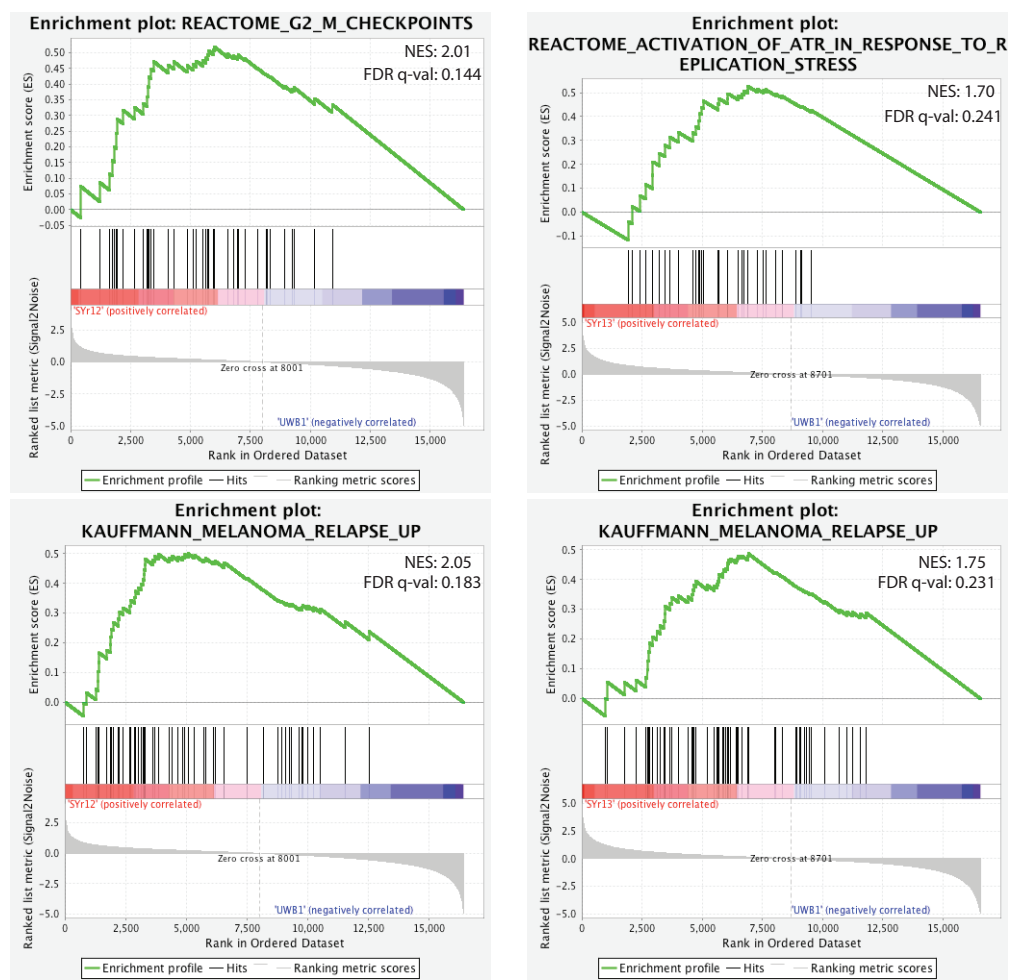

I

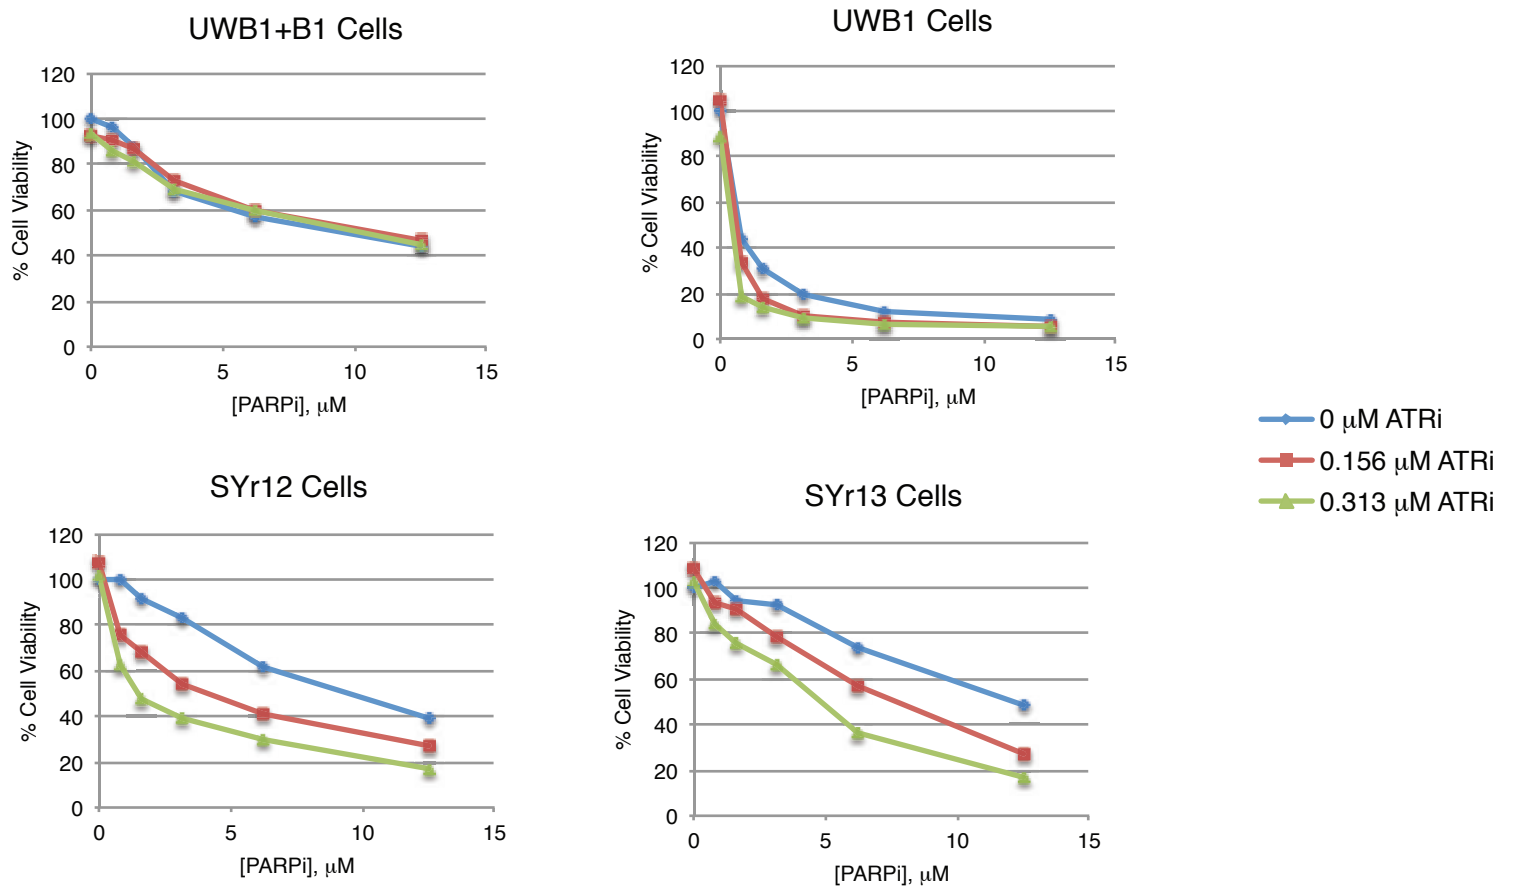

J

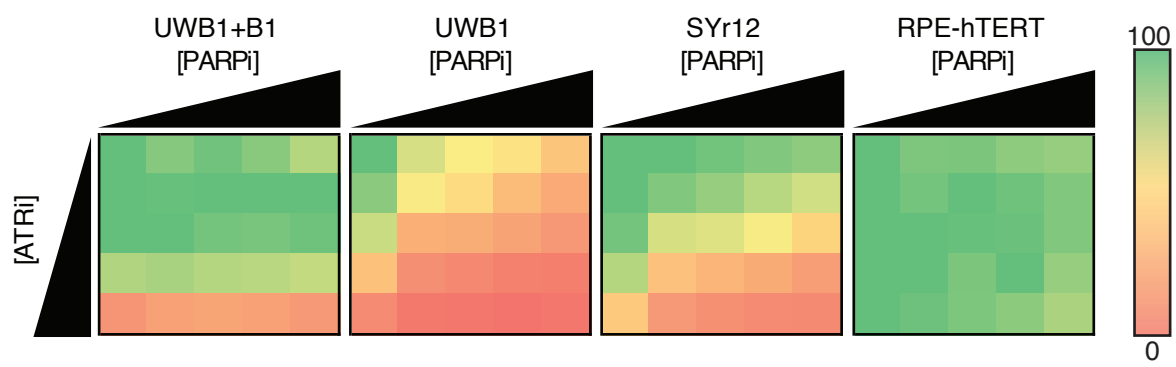

K

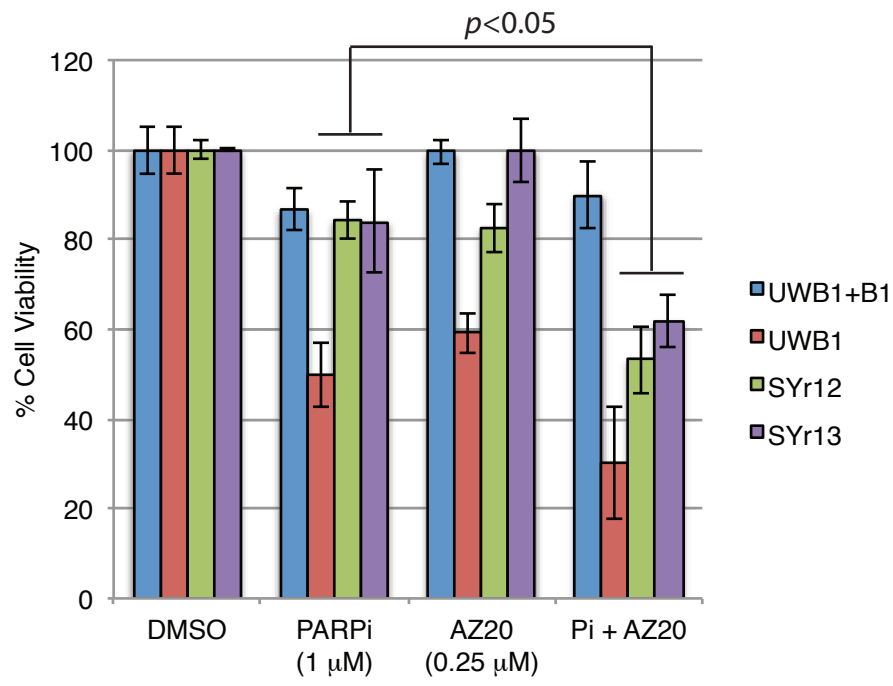

L

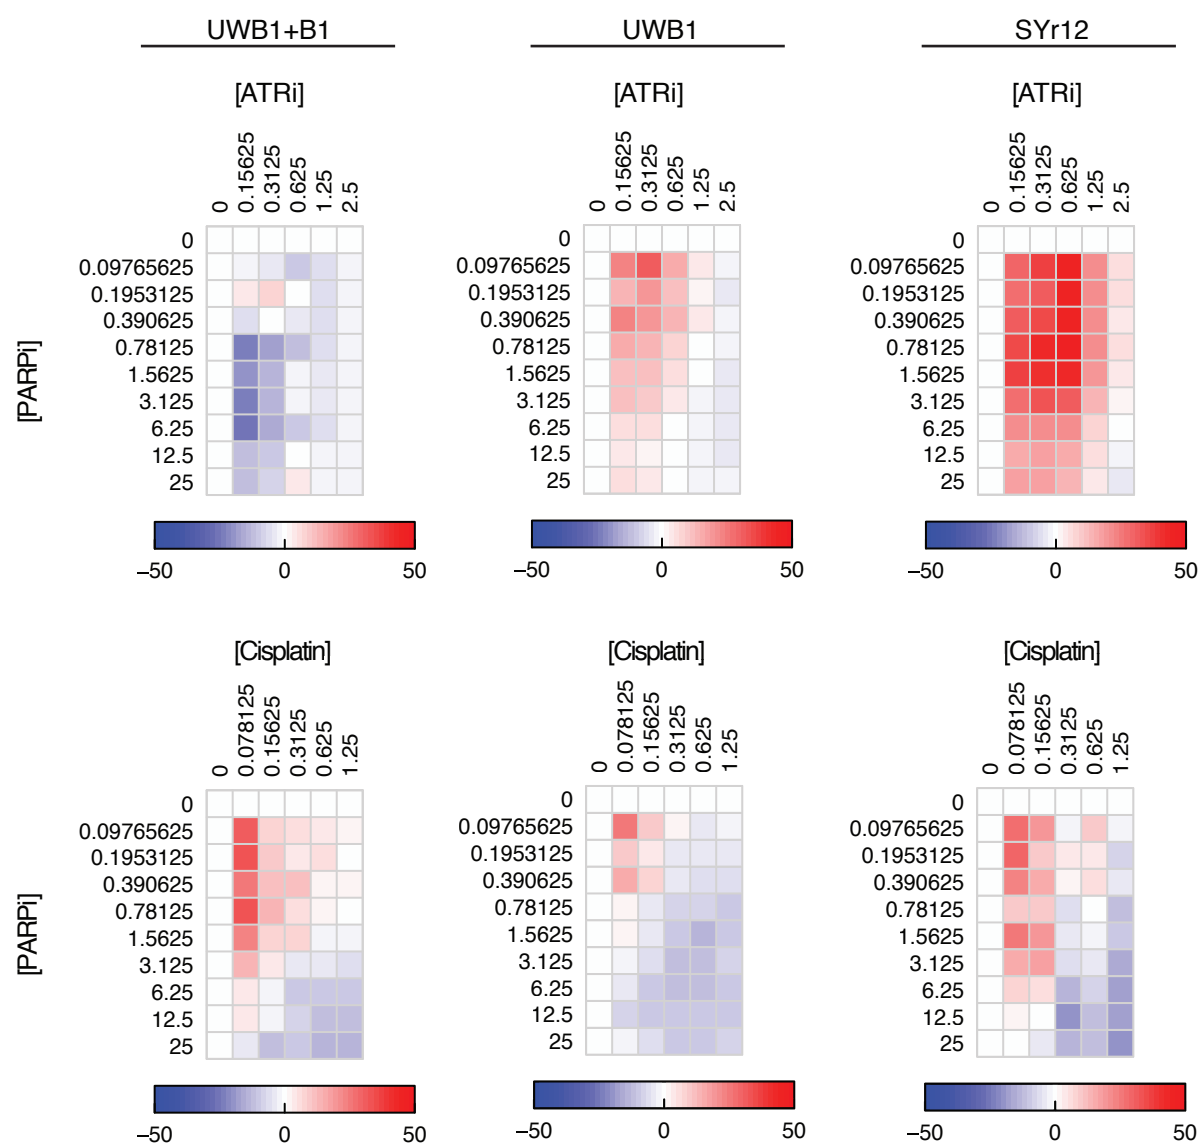

Fig. S2

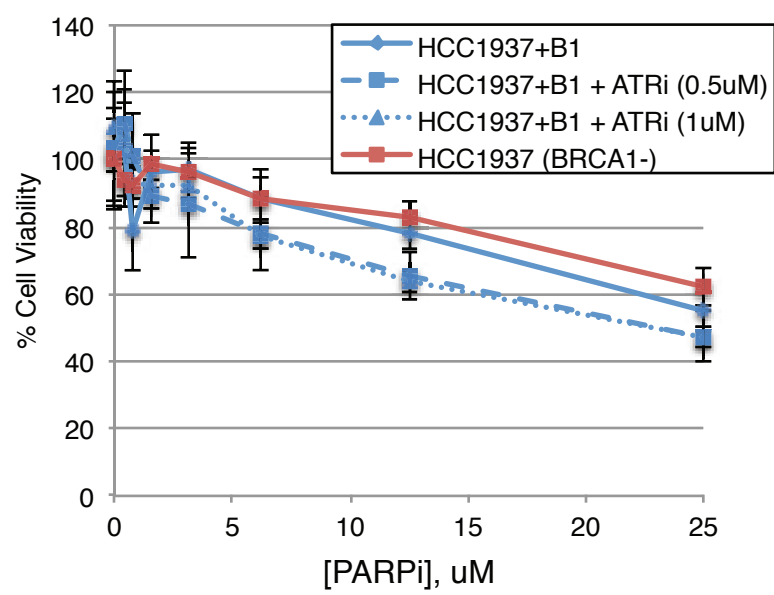

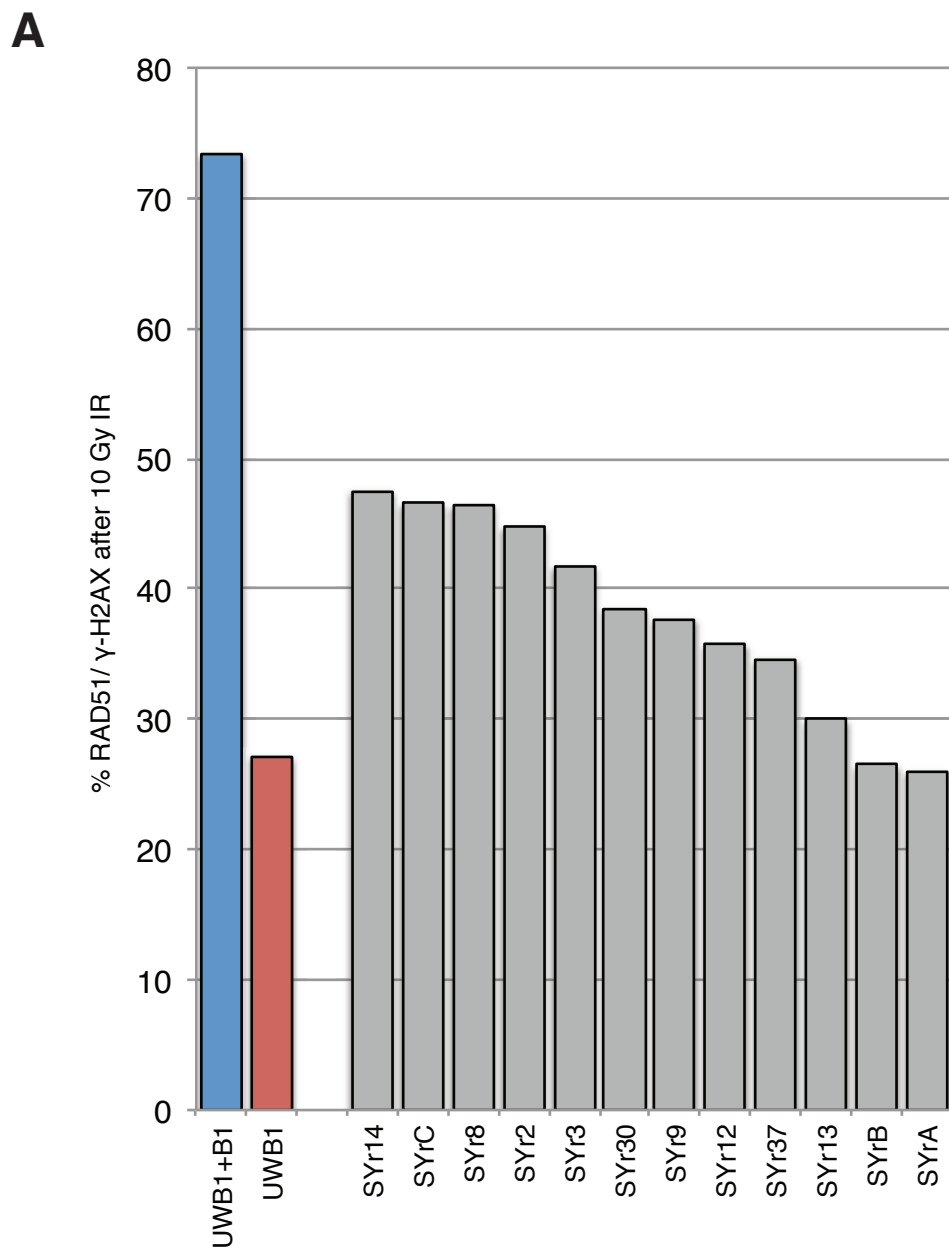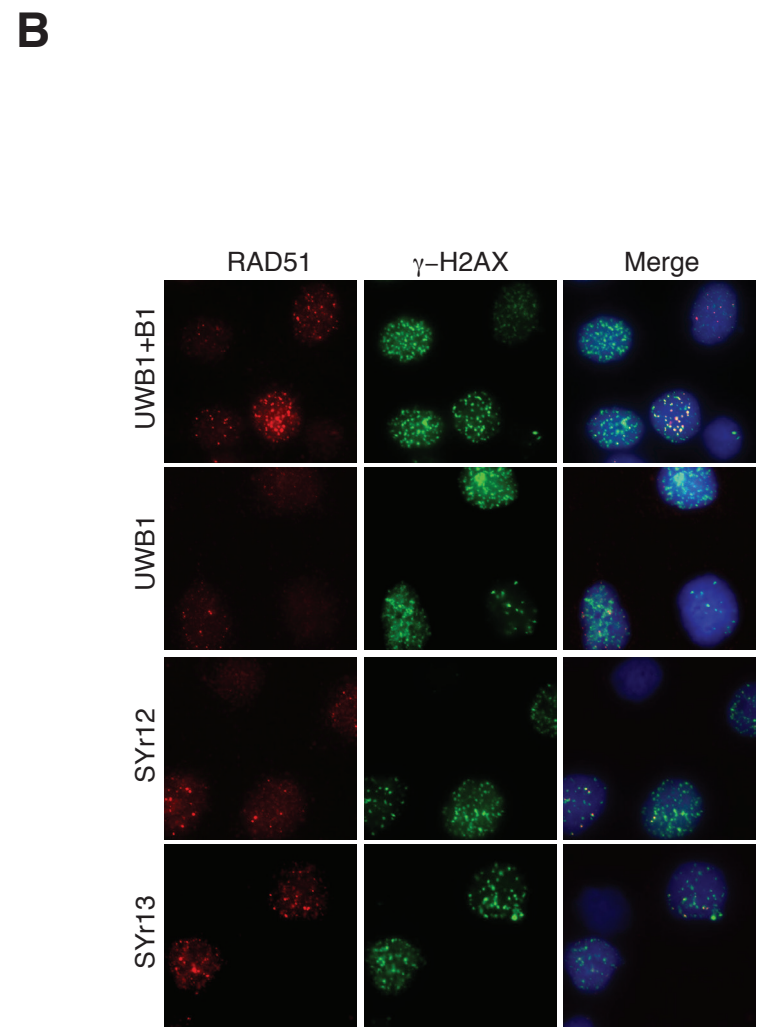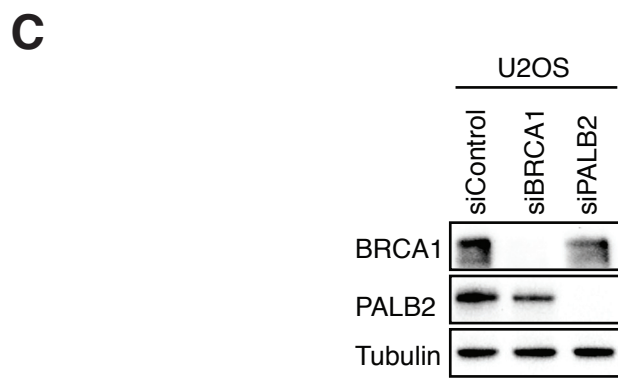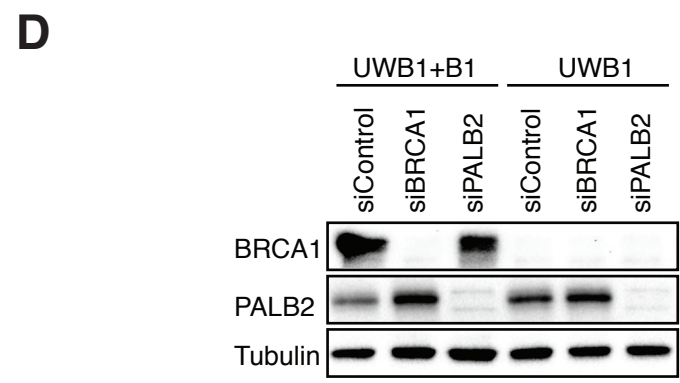

**E**

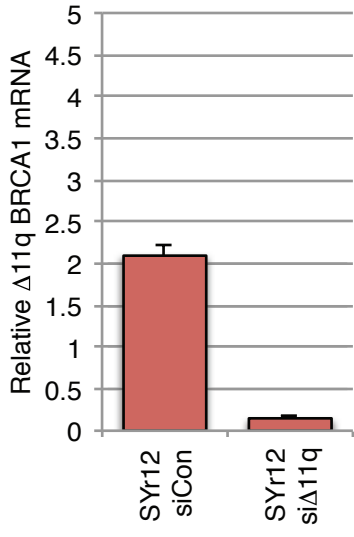

**F**

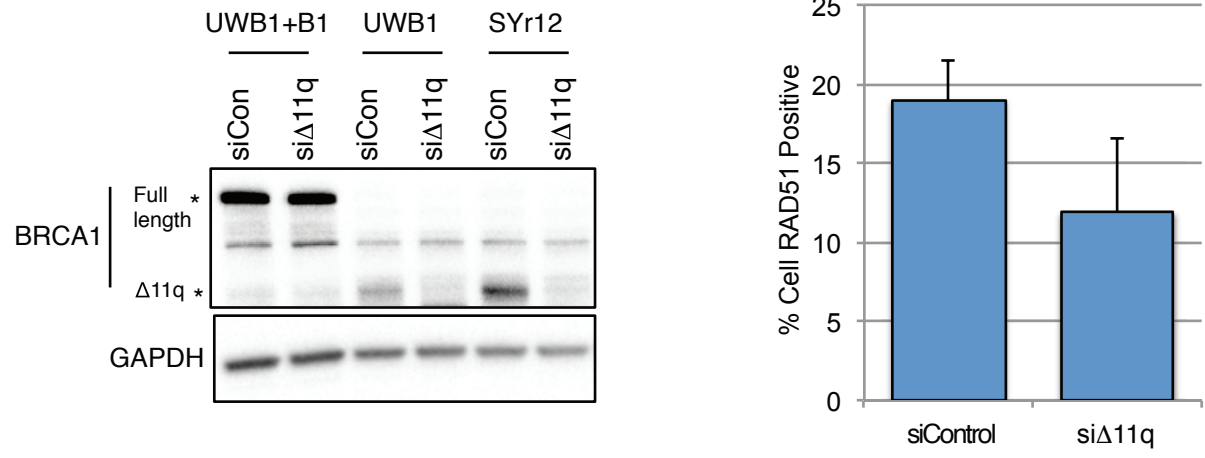

**G**

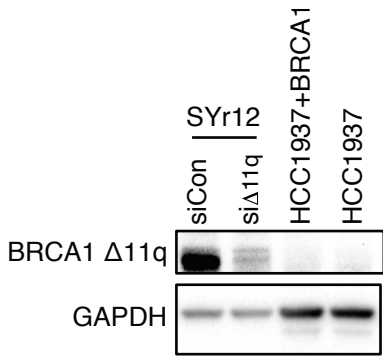

**H**

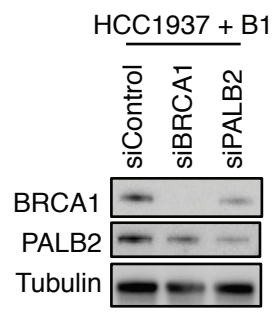

**I**

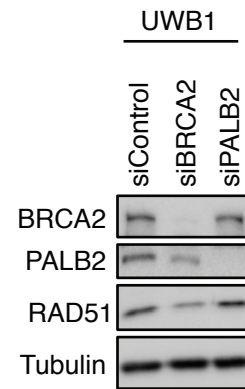

**J**

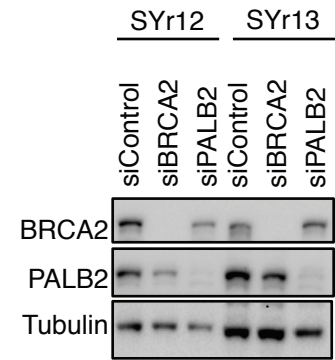

**A**

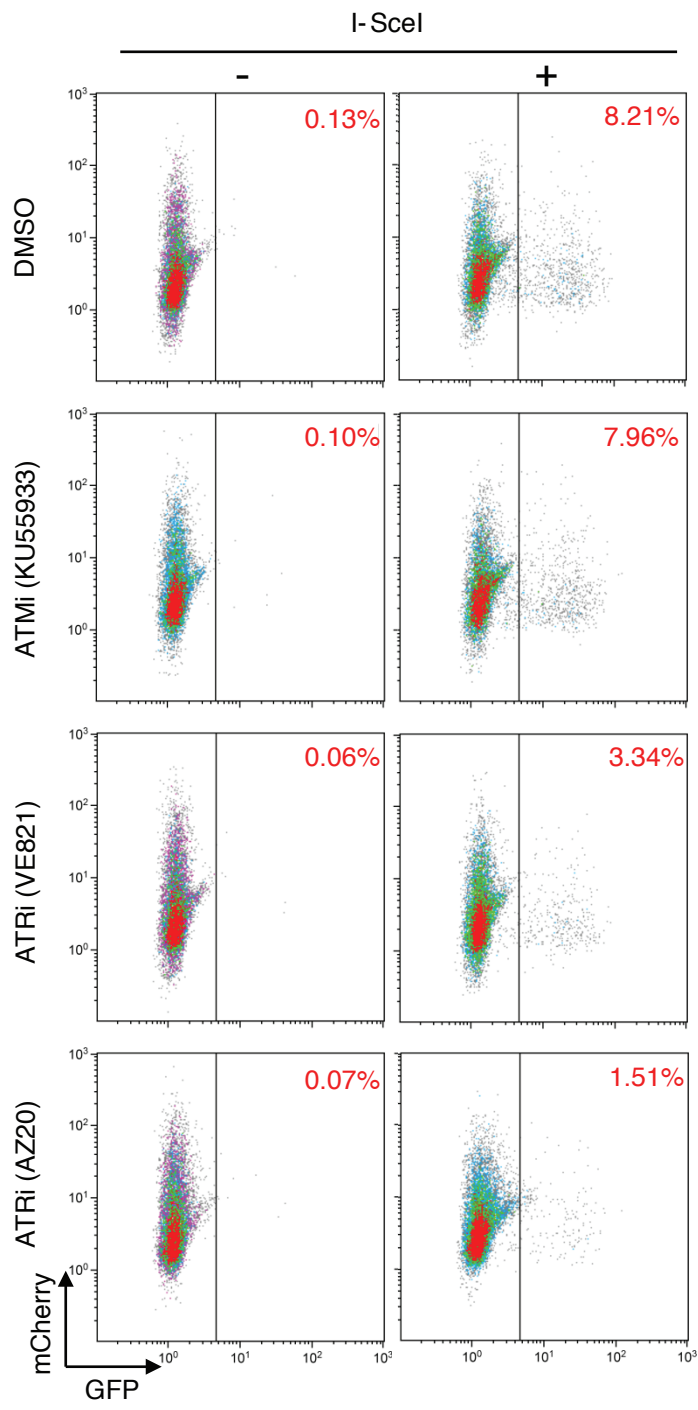

**B**

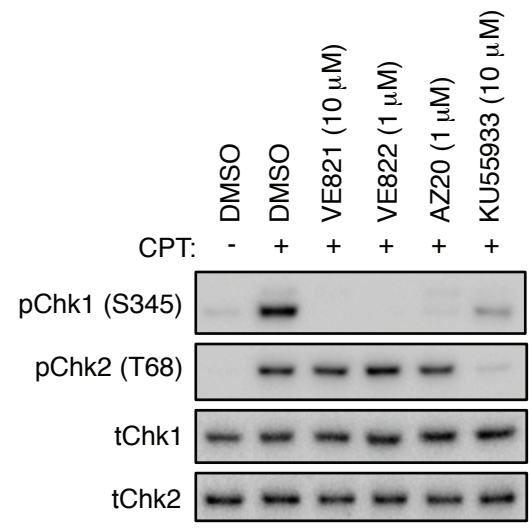

**C**

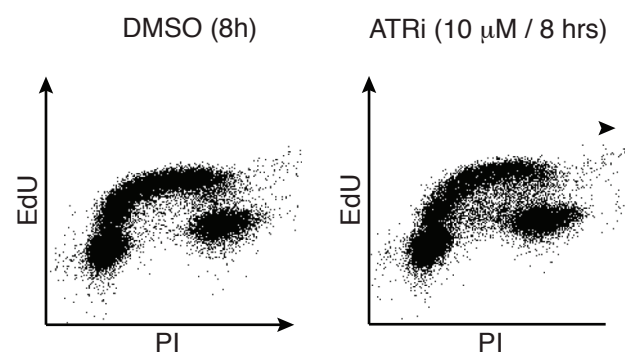

**D**

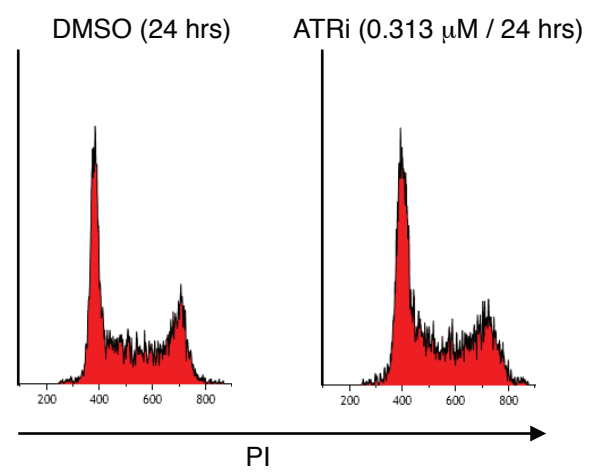

**E**

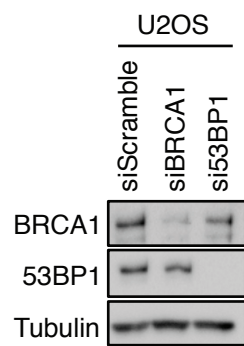

**F**

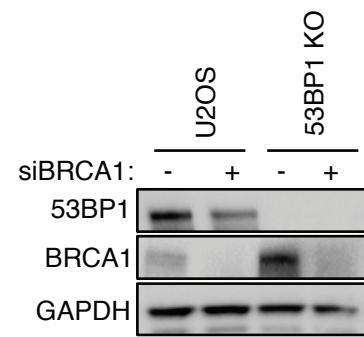



Fig. S5

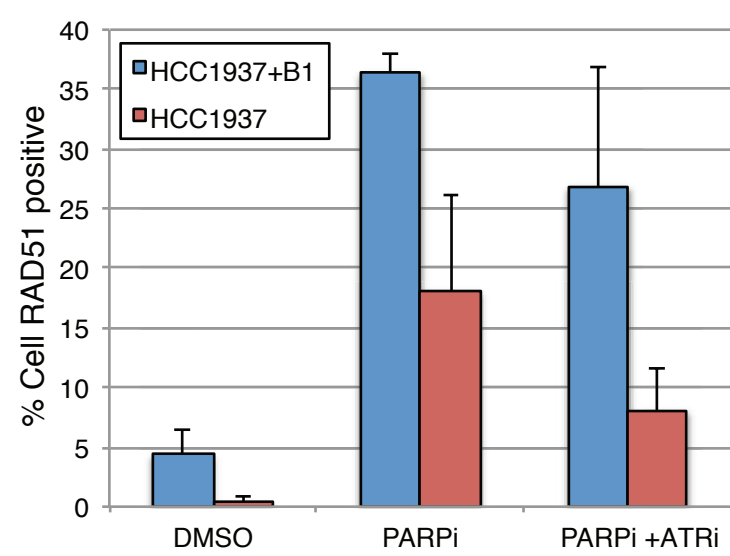

**A**

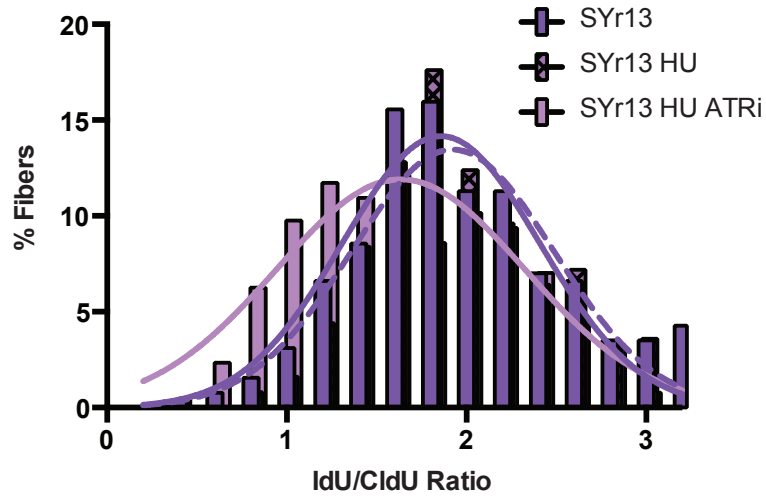

**B**

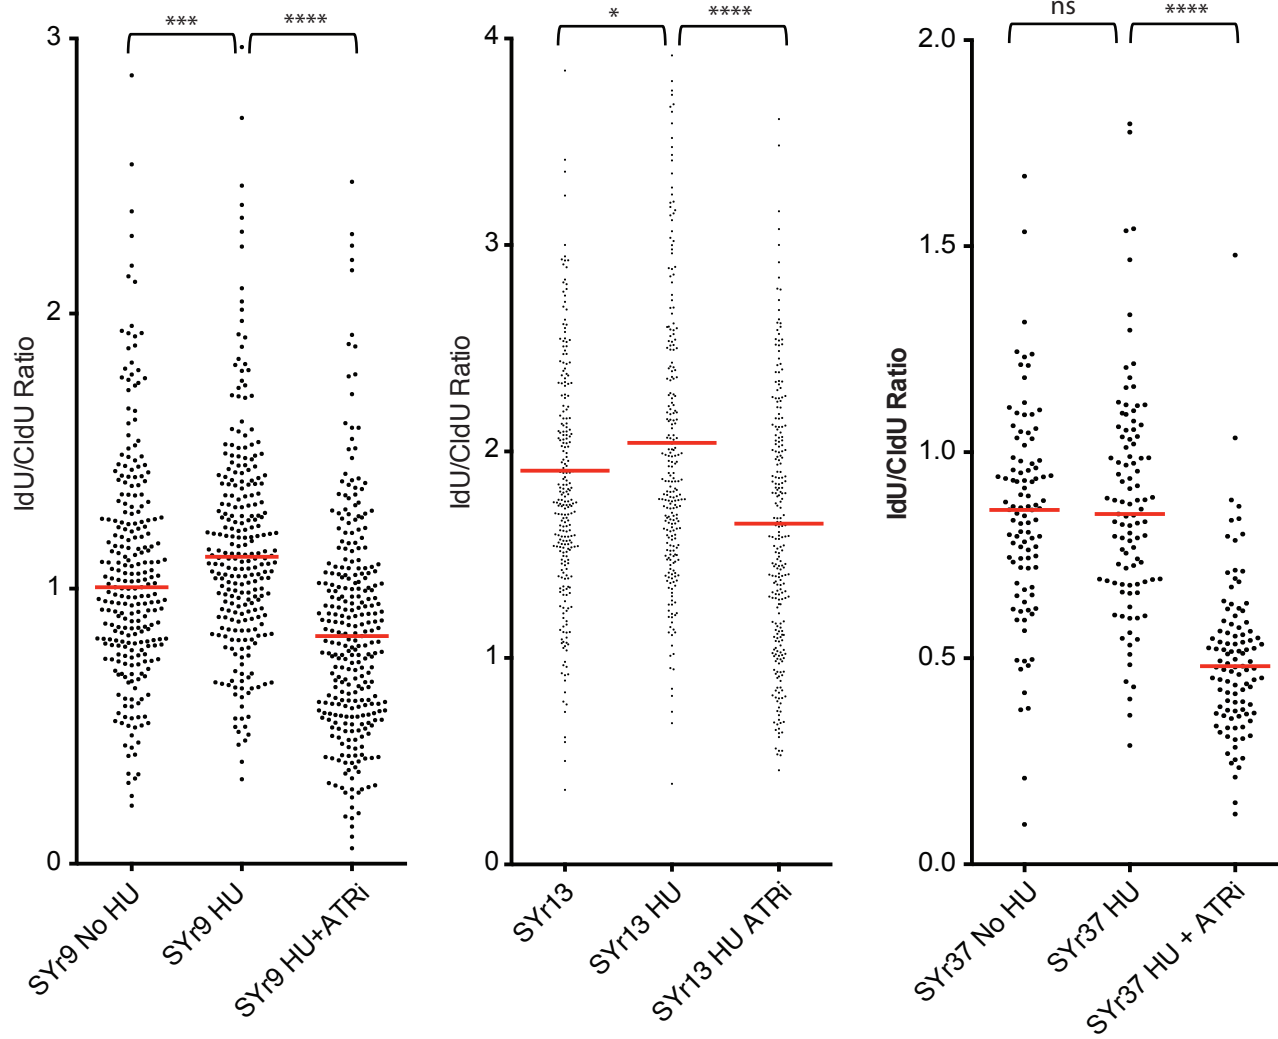

**C**

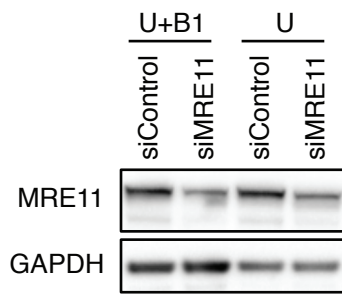

**D**

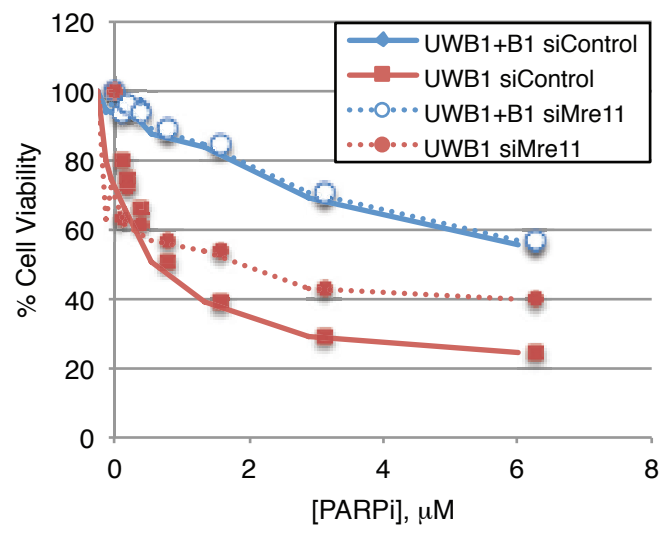

**E**

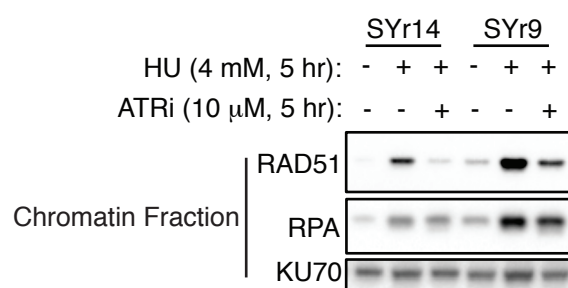

**F**

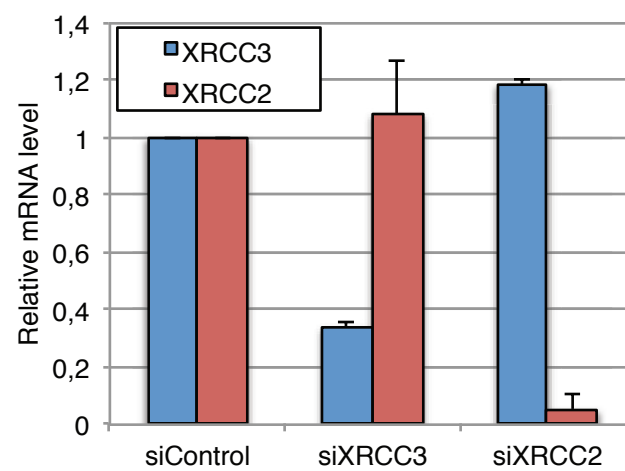

Fig. S7

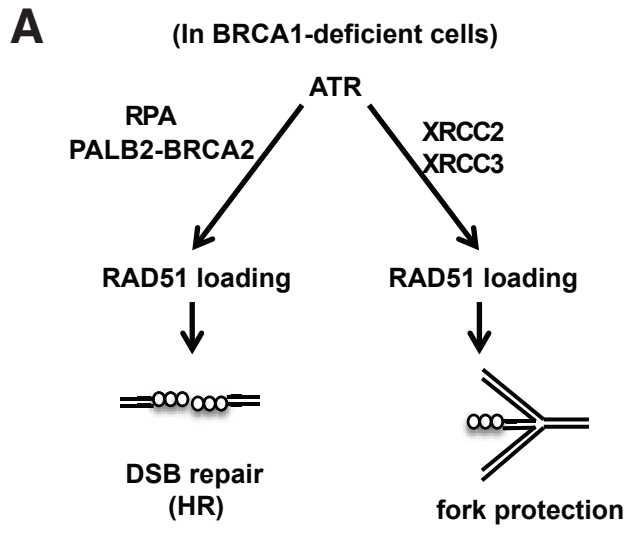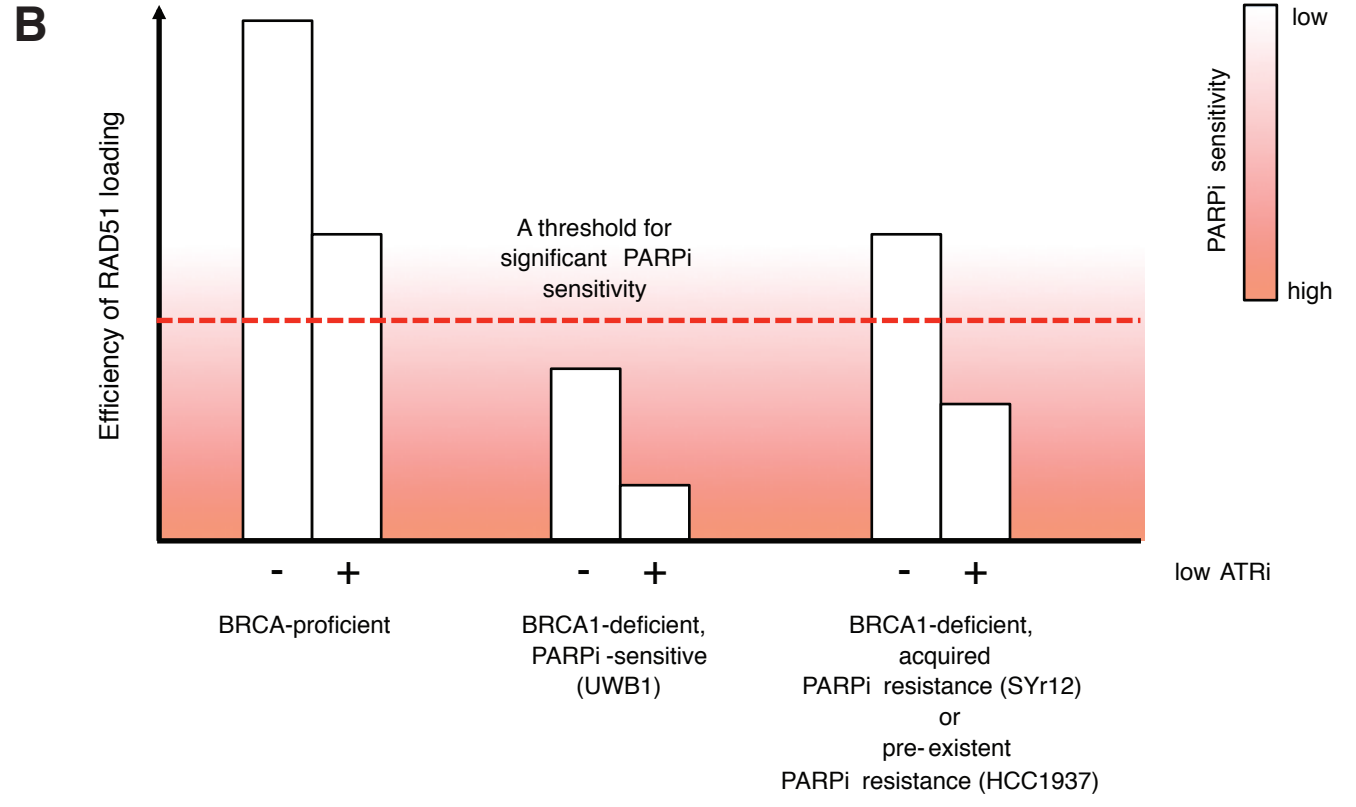

Supplement: supp_gad.290957.116_Supplemental_Data.pdf [file supp_gad.290957.116_Supplemental_Data.pdf]
